# Supplementary material for: Precisely controlled supramolecular ionic conduction paths and their structure–conductivity relationships for lithium ion transport
Source: Royal Society of Chemistry journal article supplement (doi:10.1039/c4ce01417k), 2014-09-29
Supplement: c4ce01417k1.pdf [file c4ce01417k1.pdf]

Supplementary Information

# **Precisely Controlled Supramolecular Ionic Conduction Paths and Their Structure-Conductivity Relationships for Lithium Ion Transport**

Makoto Moriya, <sup>\*a,b,‡</sup> Kuniyoshi Nomura,<sup>a</sup> Wataru Sakamoto<sup>a</sup> and Toshinobu Yogo<sup>a</sup>

<sup>a</sup> *EcoTopia Science Institute, Nagoya University, Furo-cho, Chikusa-ku, Nagoya 464-8603, Japan. E-mail: moriya@esi.nagoya-u.ac.jp*

<sup>b</sup> *PRESTO, Japan Science and Technology Agency, 4-1-8 Honcho, Kawaguchi, Saitama 332-0012, Japan.*

<sup>‡</sup> *Current address: Department of Chemistry, Graduate School of Science, Shizuoka University, 836 Ohya, Suruga-ku, Shizuoka 422-8529, Japan. E-mail: moriya.makoto@shizuoka.ac.jp*

Table S1. Crystal data and structure refinement for **1**.

|                                        |                                                                                                              |                              |
|----------------------------------------|--------------------------------------------------------------------------------------------------------------|------------------------------|
| Empirical formula                      | C <sub>18</sub> H <sub>36</sub> F <sub>12</sub> Li <sub>2</sub> N <sub>6</sub> O <sub>8</sub> S <sub>4</sub> |                              |
| Formula weight                         | 834.64                                                                                                       |                              |
| Temperature                            | 153(2) K                                                                                                     |                              |
| Wavelength                             | 0.71073 Å                                                                                                    |                              |
| Crystal system                         | Triclinic                                                                                                    |                              |
| Space group                            | P-1                                                                                                          |                              |
| Unit cell dimensions                   | $a = 8.4167(11)$ Å                                                                                           | $\alpha = 83.969(3)^\circ$ . |
|                                        | $b = 10.2057(14)$ Å                                                                                          | $\beta = 78.625(2)^\circ$ .  |
|                                        | $c = 11.0501(15)$ Å                                                                                          | $\gamma = 79.928(3)^\circ$ . |
| Volume                                 | 913.7(2) Å <sup>3</sup>                                                                                      |                              |
| Z                                      | 1                                                                                                            |                              |
| Density (calculated)                   | 1.517 Mg/m <sup>3</sup>                                                                                      |                              |
| Absorption coefficient                 | 0.367 mm <sup>-1</sup>                                                                                       |                              |
| $F(000)$                               | 428                                                                                                          |                              |
| Crystal size                           | 0.3 x 0.2 x 0.2 mm <sup>3</sup>                                                                              |                              |
| Theta range for data collection        | 1.88 to 28.34°.                                                                                              |                              |
| Index ranges                           | -10 ≤ $h$ ≤ 11, -13 ≤ $k$ ≤ 13, -14 ≤ $l$ ≤ 13                                                               |                              |
| Reflections collected                  | 6890                                                                                                         |                              |
| Independent reflections                | 4489 [ $R(\text{int}) = 0.0181$ ]                                                                            |                              |
| Completeness to theta = 28.34°         | 98.5 %                                                                                                       |                              |
| Absorption correction                  | Empirical                                                                                                    |                              |
| Refinement method                      | Full-matrix least-squares on $F^2$                                                                           |                              |
| Data / restraints / parameters         | 4489 / 0 / 230                                                                                               |                              |
| Goodness-of-fit on $F^2$               | 1.048                                                                                                        |                              |
| Final $R$ indices [ $I > 2\sigma(I)$ ] | $R_1 = 0.0401$ , $wR_2 = 0.1046$                                                                             |                              |
| $R$ indices (all data)                 | $R_1 = 0.0447$ , $wR_2 = 0.1084$                                                                             |                              |
| Largest diff. peak and hole            | 0.602 and -0.243 e.Å <sup>-3</sup>                                                                           |                              |

Table S2. Crystal data and structure refinement for **2**.

|                                                     |                                                                 |                              |
|-----------------------------------------------------|-----------------------------------------------------------------|------------------------------|
| Empirical formula                                   | C18 H36 F12 Li2 N6 O8 S4                                        |                              |
| Formula weight                                      | 834.64                                                          |                              |
| Temperature                                         | 153(2) K                                                        |                              |
| Wavelength                                          | 0.71073 Å                                                       |                              |
| Crystal system                                      | Monoclinic                                                      |                              |
| Space group                                         | <i>P</i> 2(1)/ <i>n</i>                                         |                              |
| Unit cell dimensions                                | <i>a</i> = 12.4175(14) Å                                        | $\alpha = 90^\circ$ .        |
|                                                     | <i>b</i> = 9.8024(11) Å                                         | $\beta = 105.303(3)^\circ$ . |
|                                                     | <i>c</i> = 15.7042(16) Å                                        | $\gamma = 90^\circ$ .        |
| Volume                                              | 1843.8(3) Å <sup>3</sup>                                        |                              |
| <i>Z</i>                                            | 2                                                               |                              |
| Density (calculated)                                | 1.503 Mg/m <sup>3</sup>                                         |                              |
| Absorption coefficient                              | 0.364 mm <sup>-1</sup>                                          |                              |
| <i>F</i> (000)                                      | 856                                                             |                              |
| Crystal size                                        | 0.3 x 0.3 x 0.3 mm <sup>3</sup>                                 |                              |
| Theta range for data collection                     | 1.87 to 28.33°.                                                 |                              |
| Index ranges                                        | -14 ≤ <i>h</i> ≤ 16, -13 ≤ <i>k</i> ≤ 10, -19 ≤ <i>l</i> ≤ 20   |                              |
| Reflections collected                               | 13525                                                           |                              |
| Independent reflections                             | 4575 [ <i>R</i> (int) = 0.0684]                                 |                              |
| Completeness to theta = 28.33°                      | 99.6 %                                                          |                              |
| Absorption correction                               | Empirical                                                       |                              |
| Refinement method                                   | Full-matrix least-squares on <i>F</i> <sup>2</sup>              |                              |
| Data / restraints / parameters                      | 4575 / 0 / 231                                                  |                              |
| Goodness-of-fit on <i>F</i> <sup>2</sup>            | 1.082                                                           |                              |
| Final <i>R</i> indices [ <i>I</i> > 2σ( <i>I</i> )] | <i>R</i> <sub>1</sub> = 0.0876, <i>wR</i> <sub>2</sub> = 0.1839 |                              |
| <i>R</i> indices (all data)                         | <i>R</i> <sub>1</sub> = 0.1295, <i>wR</i> <sub>2</sub> = 0.2038 |                              |
| Largest diff. peak and hole                         | 0.908 and -0.431 e.Å <sup>-3</sup>                              |                              |

Table S3. Crystal data and structure refinement for **3**.

|                                                     |                                                                                                              |                              |
|-----------------------------------------------------|--------------------------------------------------------------------------------------------------------------|------------------------------|
| Empirical formula                                   | C <sub>24</sub> H <sub>48</sub> F <sub>12</sub> Li <sub>2</sub> N <sub>6</sub> O <sub>8</sub> S <sub>4</sub> |                              |
| Formula weight                                      | 918.80                                                                                                       |                              |
| Temperature                                         | 123(2) K                                                                                                     |                              |
| Wavelength                                          | 0.71073 Å                                                                                                    |                              |
| Crystal system                                      | Monoclinic                                                                                                   |                              |
| Space group                                         | <i>P</i> 2(1)/n                                                                                              |                              |
| Unit cell dimensions                                | <i>a</i> = 11.964(3) Å                                                                                       | $\alpha = 90^\circ$ .        |
|                                                     | <i>b</i> = 10.381(3) Å                                                                                       | $\beta = 100.531(4)^\circ$ . |
|                                                     | <i>c</i> = 16.974(4) Å                                                                                       | $\gamma = 90^\circ$ .        |
| Volume                                              | 2072.6(9) Å <sup>3</sup>                                                                                     |                              |
| <i>Z</i>                                            | 2                                                                                                            |                              |
| Density (calculated)                                | 1.472 Mg/m <sup>3</sup>                                                                                      |                              |
| Absorption coefficient                              | 0.331 mm <sup>-1</sup>                                                                                       |                              |
| <i>F</i> (000)                                      | 952                                                                                                          |                              |
| Crystal size                                        | 0.50 x 0.40 x 0.40 mm <sup>3</sup>                                                                           |                              |
| Theta range for data collection                     | 1.93 to 27.50°.                                                                                              |                              |
| Index ranges                                        | -15 ≤ <i>h</i> ≤ 15, -13 ≤ <i>k</i> ≤ 13, -15 ≤ <i>l</i> ≤ 22                                                |                              |
| Reflections collected                               | 14123                                                                                                        |                              |
| Independent reflections                             | 4757 [ <i>R</i> (int) = 0.0237]                                                                              |                              |
| Completeness to theta = 27.50°                      | 99.9 %                                                                                                       |                              |
| Absorption correction                               | Empirical                                                                                                    |                              |
| Max. and min. transmission                          | 0.8789 and 0.8518                                                                                            |                              |
| Refinement method                                   | Full-matrix least-squares on <i>F</i> <sup>2</sup>                                                           |                              |
| Data / restraints / parameters                      | 4757 / 0 / 257                                                                                               |                              |
| Goodness-of-fit on <i>F</i> <sup>2</sup>            | 1.016                                                                                                        |                              |
| Final <i>R</i> indices [ <i>I</i> > 2σ( <i>I</i> )] | <i>R</i> <sub>1</sub> = 0.0324, <i>wR</i> <sub>2</sub> = 0.0877                                              |                              |
| <i>R</i> indices (all data)                         | <i>R</i> <sub>1</sub> = 0.0362, <i>wR</i> <sub>2</sub> = 0.0910                                              |                              |
| Largest diff. peak and hole                         | 0.553 and -0.290 e.Å <sup>-3</sup>                                                                           |                              |

Table S4. Crystal data and structure refinement for **5**.

|                                                     |                                                                 |                       |
|-----------------------------------------------------|-----------------------------------------------------------------|-----------------------|
| Empirical formula                                   | C14 H32 F6 Li2 N4 O6 S2                                         |                       |
| Formula weight                                      | 544.44                                                          |                       |
| Temperature                                         | 153(2) K                                                        |                       |
| Wavelength                                          | 0.71073 Å                                                       |                       |
| Crystal system                                      | Orthorhombic                                                    |                       |
| Space group                                         | <i>Pccn</i>                                                     |                       |
| Unit cell dimensions                                | $a = 12.2852(14)$ Å                                             | $\alpha = 90^\circ$ . |
|                                                     | $b = 13.5924(16)$ Å                                             | $\beta = 90^\circ$ .  |
|                                                     | $c = 16.4701(19)$ Å                                             | $\gamma = 90^\circ$ . |
| Volume                                              | 2750.3(6) Å <sup>3</sup>                                        |                       |
| Z                                                   | 4                                                               |                       |
| Density (calculated)                                | 1.315 Mg/m <sup>3</sup>                                         |                       |
| Absorption coefficient                              | 0.266 mm <sup>-1</sup>                                          |                       |
| <i>F</i> (000)                                      | 1136                                                            |                       |
| Crystal size                                        | 0.20 x 0.20 x 0.20 mm <sup>3</sup>                              |                       |
| Theta range for data collection                     | 2.23 to 27.50°.                                                 |                       |
| Index ranges                                        | -15 ≤ <i>h</i> ≤ 15, -17 ≤ <i>k</i> ≤ 16, -21 ≤ <i>l</i> ≤ 18   |                       |
| Reflections collected                               | 17947                                                           |                       |
| Independent reflections                             | 3158 [ <i>R</i> (int) = 0.0362]                                 |                       |
| Completeness to theta = 27.50°                      | 99.9 %                                                          |                       |
| Absorption correction                               | Empirical                                                       |                       |
| Max. and min. transmission                          | 0.9486 and 0.9486                                               |                       |
| Refinement method                                   | Full-matrix least-squares on <i>F</i> <sup>2</sup>              |                       |
| Data / restraints / parameters                      | 3158 / 0 / 158                                                  |                       |
| Goodness-of-fit on <i>F</i> <sup>2</sup>            | 1.042                                                           |                       |
| Final <i>R</i> indices [ <i>I</i> > 2σ( <i>I</i> )] | <i>R</i> <sub>1</sub> = 0.0732, <i>wR</i> <sub>2</sub> = 0.2063 |                       |
| <i>R</i> indices (all data)                         | <i>R</i> <sub>1</sub> = 0.0889, <i>wR</i> <sub>2</sub> = 0.2276 |                       |
| Largest diff. peak and hole                         | 0.605 and -0.347 e.Å <sup>-3</sup>                              |                       |

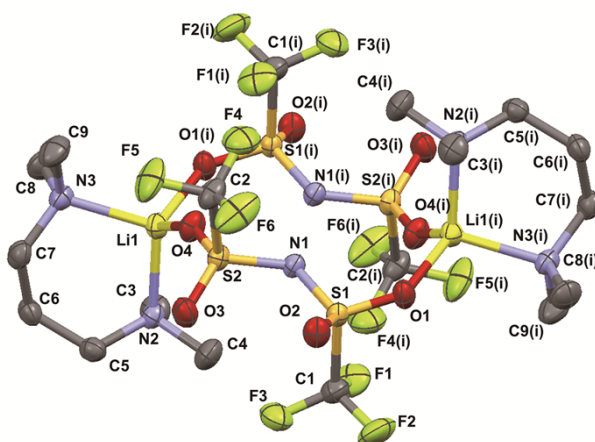

Fig. S1. Crystal structure of **1** with labels (Li: yellow, C: gray, N: blue, O: red, F: green, S: dark yellow. Thermal ellipsoid is 40 % probability. Hydrogen atoms are omitted for clarity.). The dimer in compound **1** lies about an inversion centre. The atoms in the asymmetric unit of the CIF are labelled as Li1 and any symmetry-related atoms are described as Li1(i) for clarity.

Table S5. Selected bond distances (Å) and angles (°) for **1**.

|              |            |              |            |              |            |
|--------------|------------|--------------|------------|--------------|------------|
| Li1-O1(i)    | 1.946(4)   | Li1-O4       | 1.932(3)   | Li1-N2       | 2.031(3)   |
| Li1-N3       | 2.055(3)   |              |            |              |            |
| O1(i)-Li1-O4 | 110.51(14) | O1(i)-Li1-N2 | 111.37(14) | O1(i)-Li1-N3 | 108.73(14) |
| O4-Li1-N2    | 113.40(14) | O4-Li1-N3    | 109.29(14) | N2-Li1-N3    | 103.21(13) |

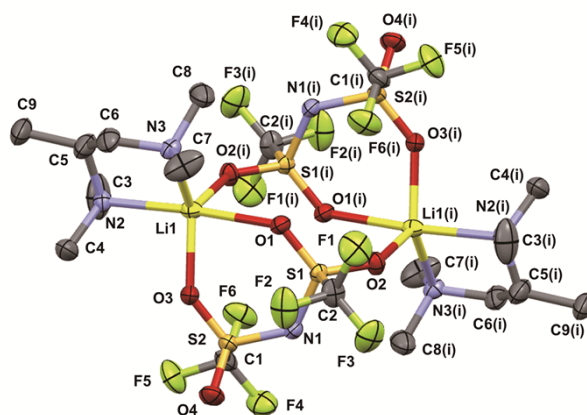

Fig. S2. Crystal structure of **2** with labels (Li: yellow, C: gray, N: blue, O: red, F: green, S: dark yellow. Thermal ellipsoid is 40 % probability. Hydrogen atoms are omitted for clarity.). The dimer in compound **2** lies about an inversion centre. The atoms in the asymmetric unit of the CIF are labelled as Li1 and any symmetry-related atoms are described as Li1(i) for clarity.

Table S6. Selected bond distances (Å) and angles (°) for **2**.

|              |          |              |          |              |          |
|--------------|----------|--------------|----------|--------------|----------|
| Li1-O1       | 2.257(8) | Li1-O2(i)    | 2.014(7) | Li1-O3       | 1.983(8) |
| Li1-N2       | 2.185(8) | Li1-N3       | 2.082(8) |              |          |
| O1-Li1-O2(i) | 88.2(3)  | O1-Li1-O3    | 80.9(3)  | O1-Li1-N2    | 174.2(4) |
| O1-Li1-N3    | 93.3(3)  | O2(i)-Li1-O3 | 117.6(4) | O2(i)-Li1-N2 | 97.5(3)  |
| O2(i)-Li1-N3 | 112.6(3) | O3-Li1-N2    | 95.2(3)  | O3-Li1-N3    | 129.1(4) |
| N2-Li1-N3    | 85.8(3)  |              |          |              |          |

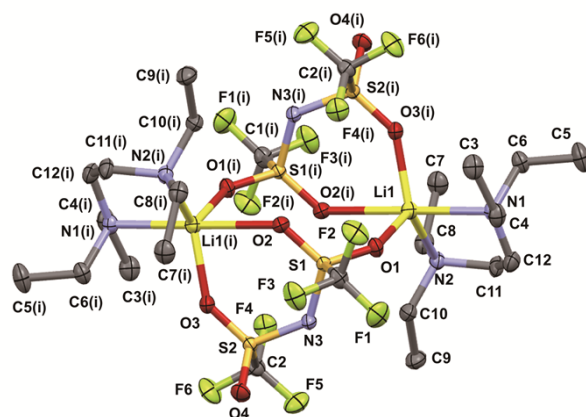

Fig. S3. Crystal structure of **3** with labels (Li: yellow, C: gray, N: blue, O: red, F: green, S: dark yellow. Thermal ellipsoid is 40 % probability. Hydrogen atoms are omitted for clarity.). The dimer in compound **3** lies about an inversion centre. The atoms in the asymmetric unit of the CIF are labelled as Li1 and any symmetry-related atoms are described as Li1(i) for clarity.

Table S7. Selected bond distances (Å) and angles (°) for **3**.

|              |            |                 |            |              |            |
|--------------|------------|-----------------|------------|--------------|------------|
| Li1-O1       | 2.015(2)   | Li1-O2(i)       | 2.337(3)   | Li1-O3(i)    | 1.976(2)   |
| Li1-N1       | 2.161(3)   | Li1-N2          | 2.122(3)   |              |            |
| O1-Li1-O2(i) | 85.21(9)   | O1-Li1-O3(i)    | 112.54(11) | O1-Li1-N1    | 96.99(10)  |
| O1-Li1-N2    | 117.26(11) | O2(i)-Li1-O3(i) | 80.58(8)   | O2(i)-Li1-N1 | 177.10(12) |
| O2(i)-Li1-N2 | 90.64(9)   | O3(i)-Li1-N1    | 100.24(11) | O3(i)-Li1-N2 | 128.39(12) |
| N1-Li1-N2    | 86.68(9)   |                 |            |              |            |



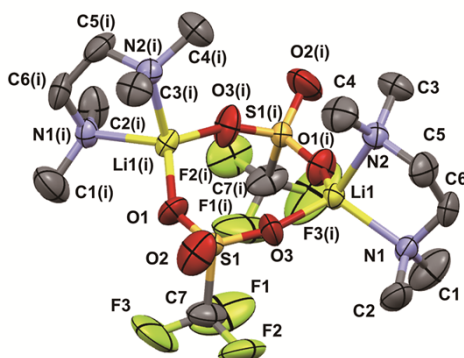

Fig. S4. Crystal structure of **5** with labels (Li: yellow, C: gray, N: blue, O: red, F: green, S: dark yellow). Thermal ellipsoid is 40 % probability. Hydrogen atoms are omitted for clarity.). The dimer in compound **5** lies about a twofold axis. The atoms in the asymmetric unit of the CIF are labelled as Li1 and any symmetry-related atoms are described as Li1(i) for clarity.

Table S8. Selected bond distances (Å) and angles (°) for **5**.

|              |          |              |          |              |          |
|--------------|----------|--------------|----------|--------------|----------|
| Li1-O1(i)    | 1.894(5) | Li1-O3       | 1.897(5) | Li1-N1       | 2.081(5) |
| Li1-N2       | 2.085(6) |              |          |              |          |
| O1(i)-Li1-O3 | 117.9(3) | O1(i)-Li1-N1 | 113.2(3) | O1(i)-Li1-N2 | 111.4(2) |
| O3-Li1-N1    | 110.9(2) | O3-Li1-N2    | 110.8(3) | N1-Li1-N2    | 89.0(2)  |

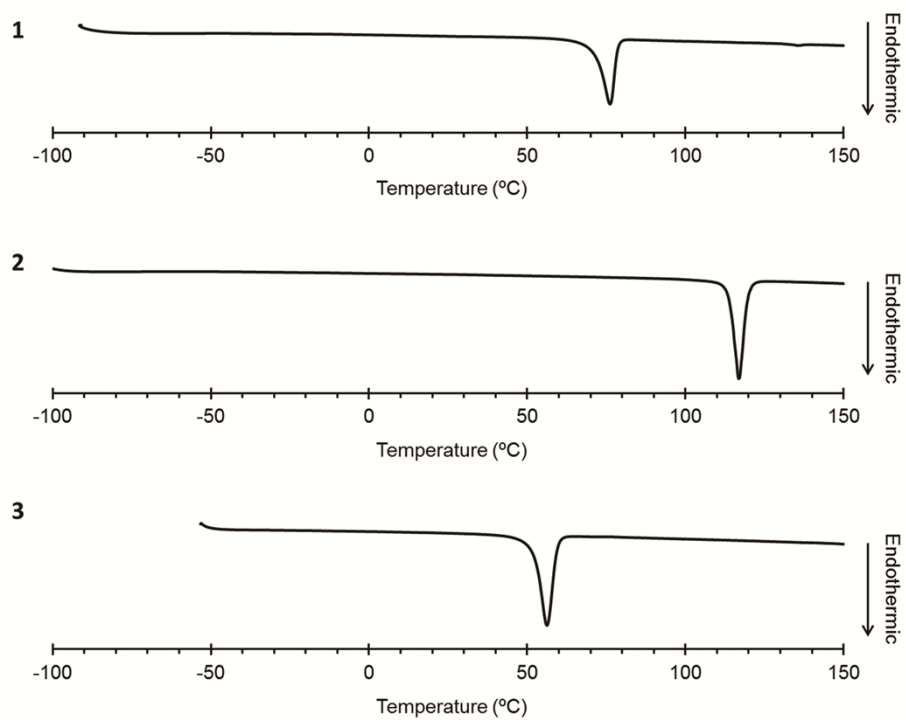

Fig. S5. DSC curves of **1**, **2** and **3**.

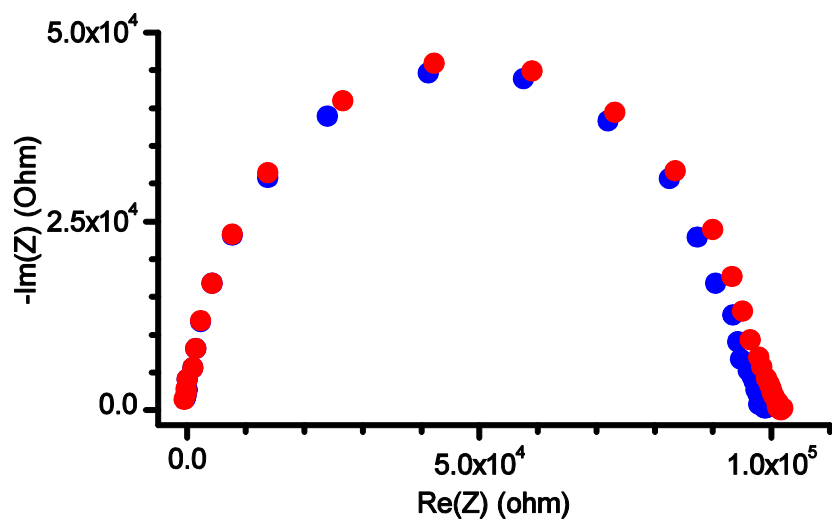

Fig. S6. Cole-Cole plots of **1** measured at 60 °C using lithium electrodes to evaluate  $t_{Li^+}$  value (Blue: Before dc measurement, Red: After dc measurement).

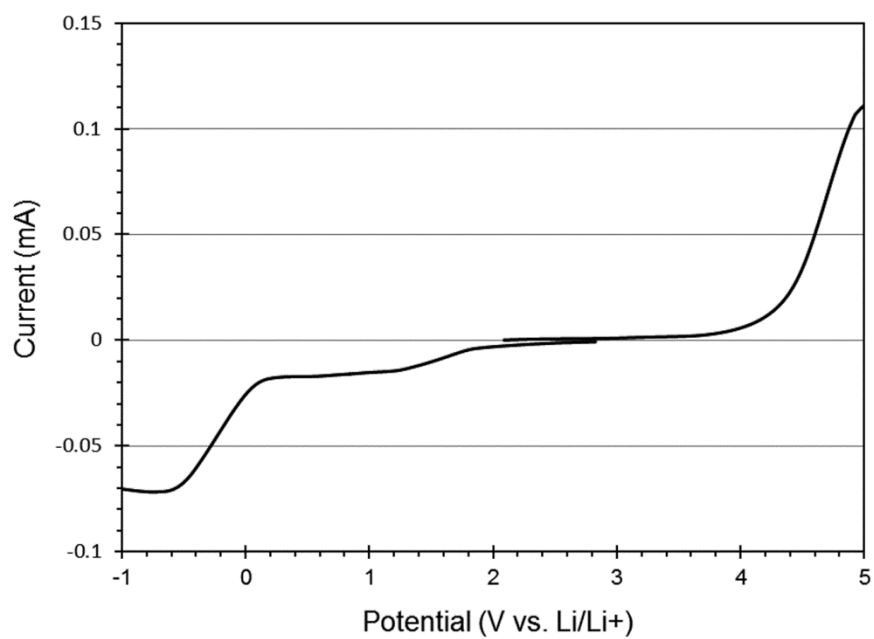

Fig. S7. Linear sweep voltammogram of **1**.
